# Supplementary material
Source: PubMed Central journal article supplement (PMC6390687)
Supplement: MD-010-C8MD00545A-s001.pdf [file MD-010-C8MD00545A-s001.pdf]

## Supporting Information

### **Synthesis and pharmacological evaluation of thiophene bioisosteres of potent GluN2B ligands with a benzo[7]annulene-scaffold**

Sören Baumeister,<sup>a</sup> Dirk Schepmann,<sup>a</sup> Bernhard Wünsch<sup>a,b</sup>

<sup>a</sup> Institut für Pharmazeutische und Medizinische Chemie der Universität Münster,  
Corrensstraße 48, D-48149 Münster, Germany.

Tel.: +49-251-83-33311; Fax: +49-251-83-32144; [wuensch@uni-muenster.de](mailto:wuensch@uni-muenster.de)

<sup>b</sup> Cells-in-Motion Cluster of Excellence (EXC 1003 – CiM), Westfälische Wilhelms-  
Universität Münster, Germany.

#### **Contents**

#### **NMR spectra of prepared compounds**

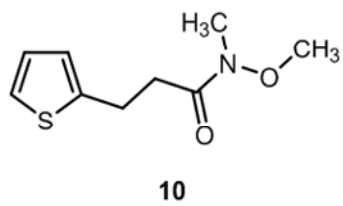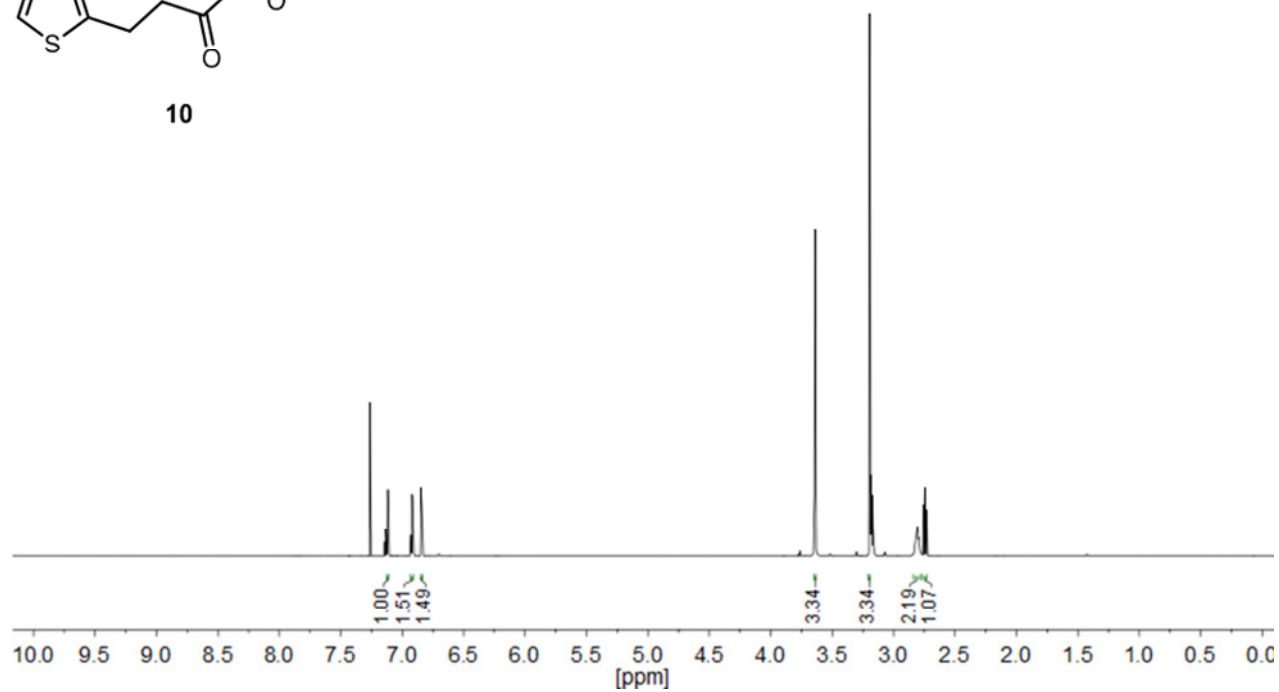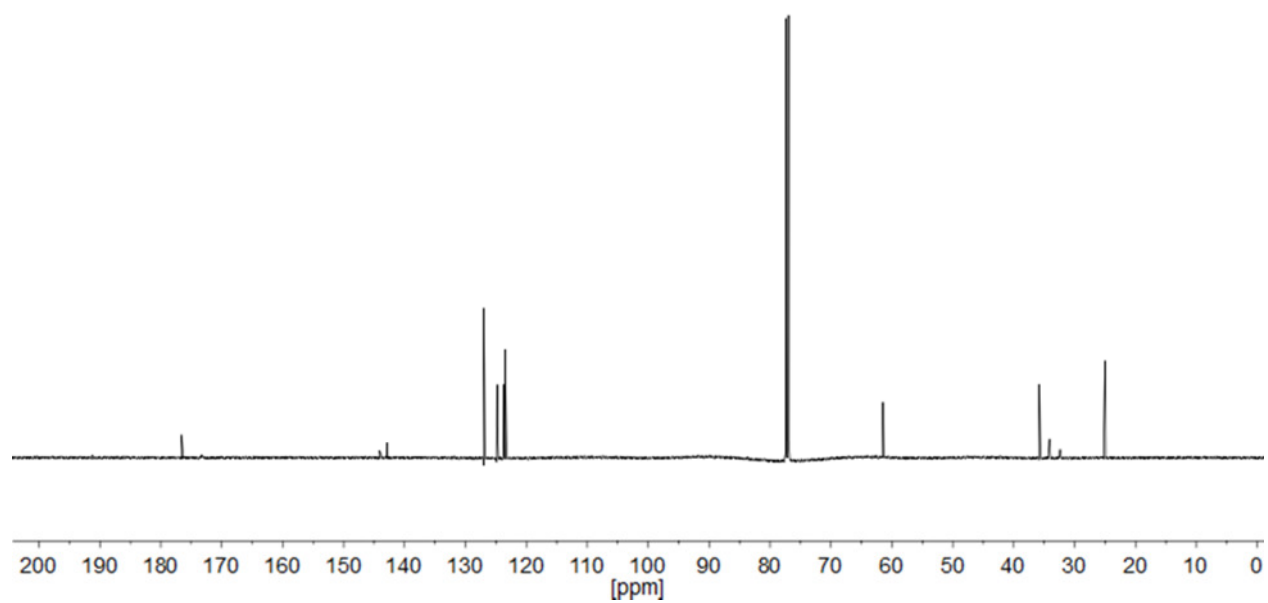

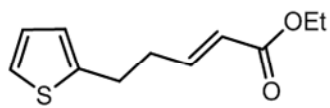

**12**

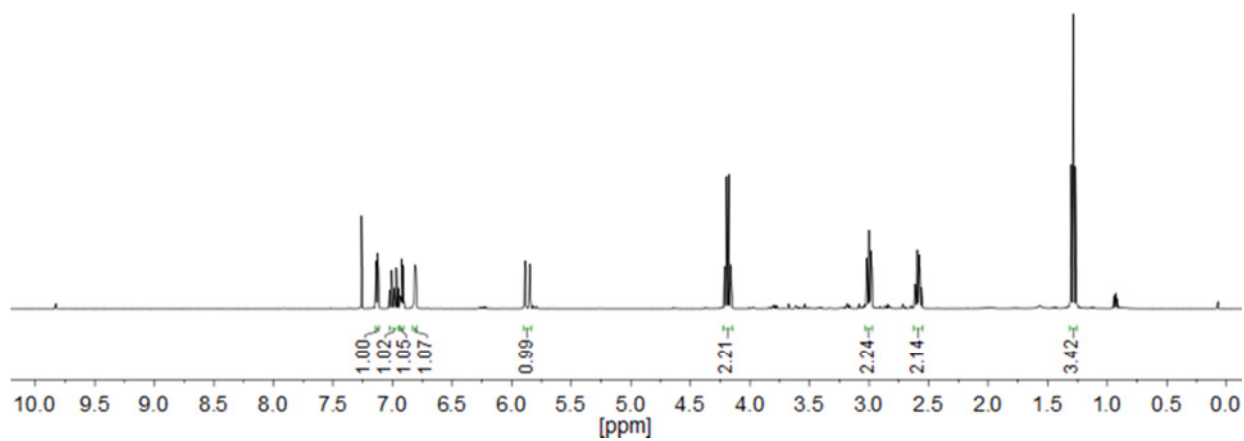

<sup>1</sup>H NMR-Spectrum (CDCl<sub>3</sub>) of **12**.

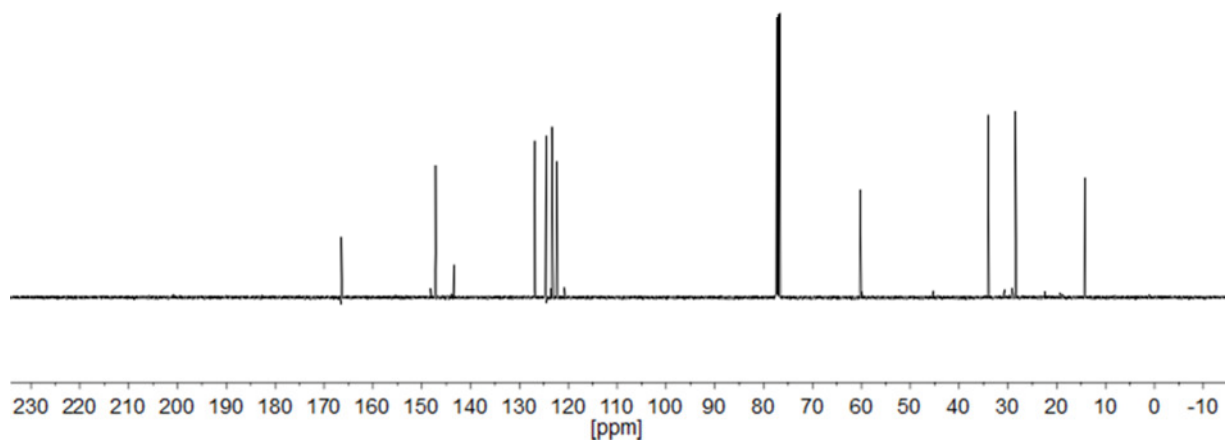

<sup>13</sup>C NMR-Spectrum (CDCl<sub>3</sub>) of **12**.

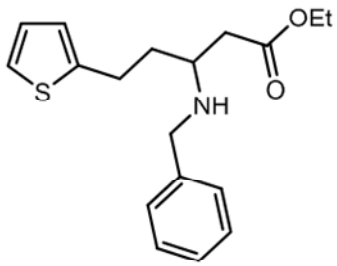

**13**

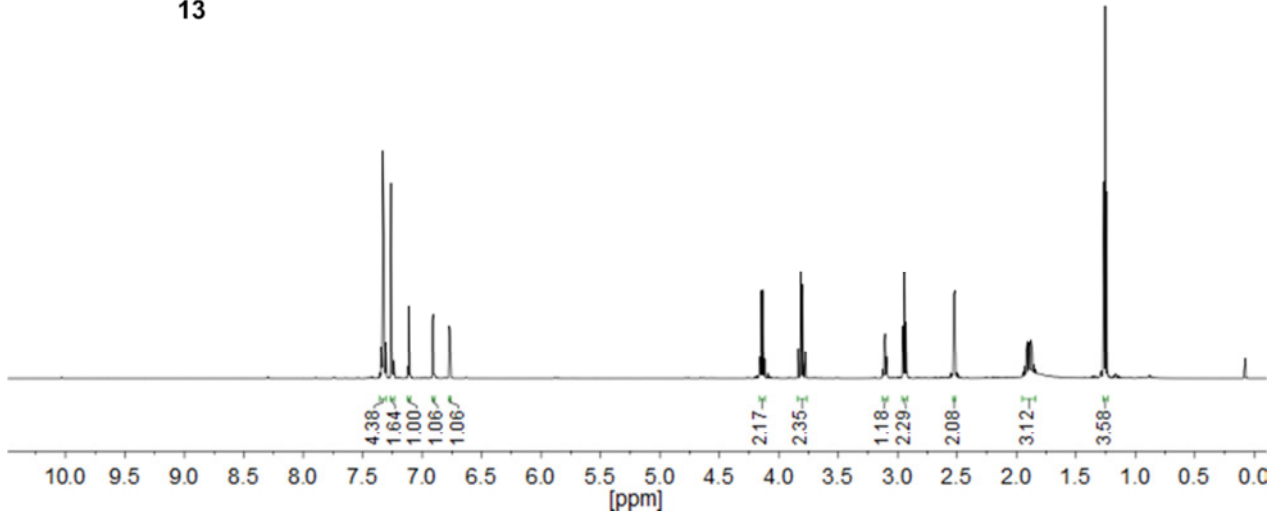

<sup>1</sup>H NMR-Spectrum (CDCl<sub>3</sub>) of **13**.

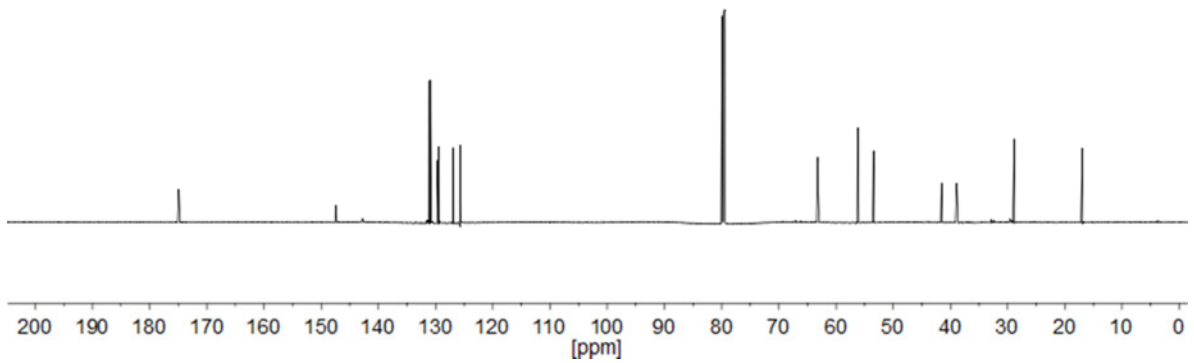

<sup>13</sup>C-NMR-Spectrum (CDCl<sub>3</sub>) of **13**.

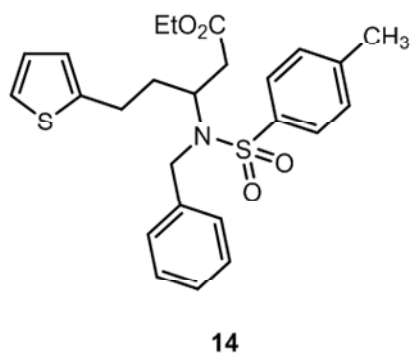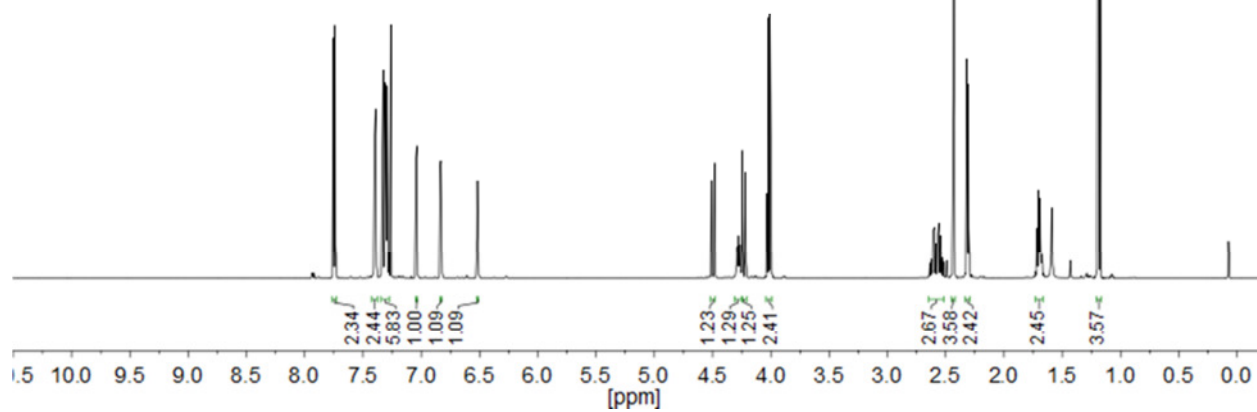

<sup>1</sup>H NMR-Spectrum (CDCl<sub>3</sub>) of **14**.

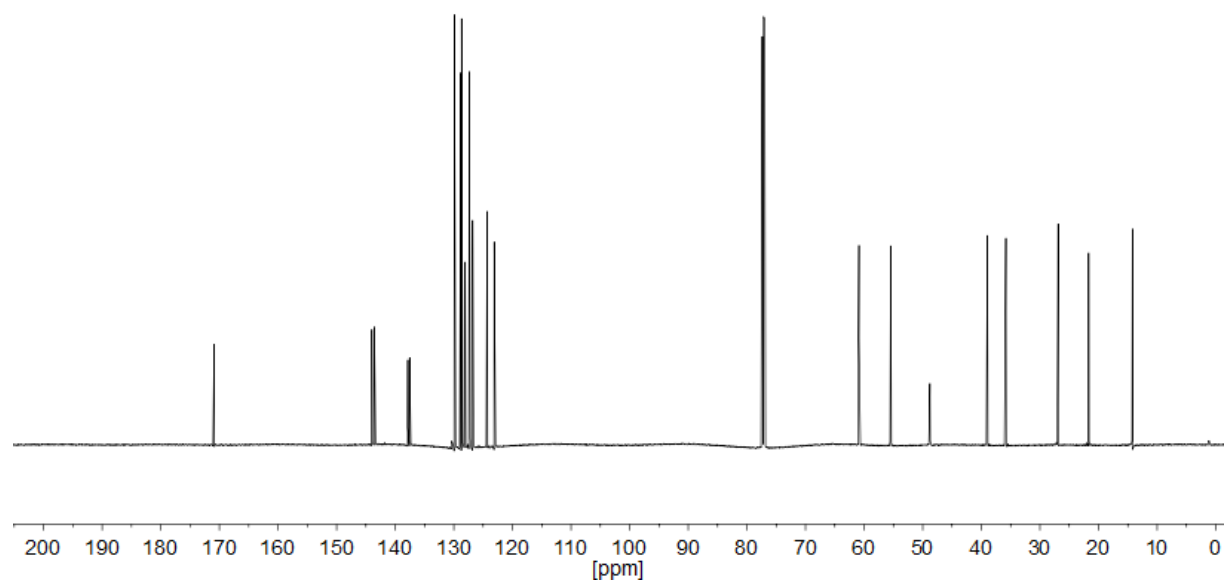

<sup>13</sup>C NMR-Spectrum (CDCl<sub>3</sub>) of **14**.

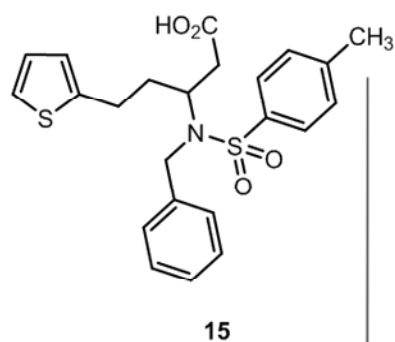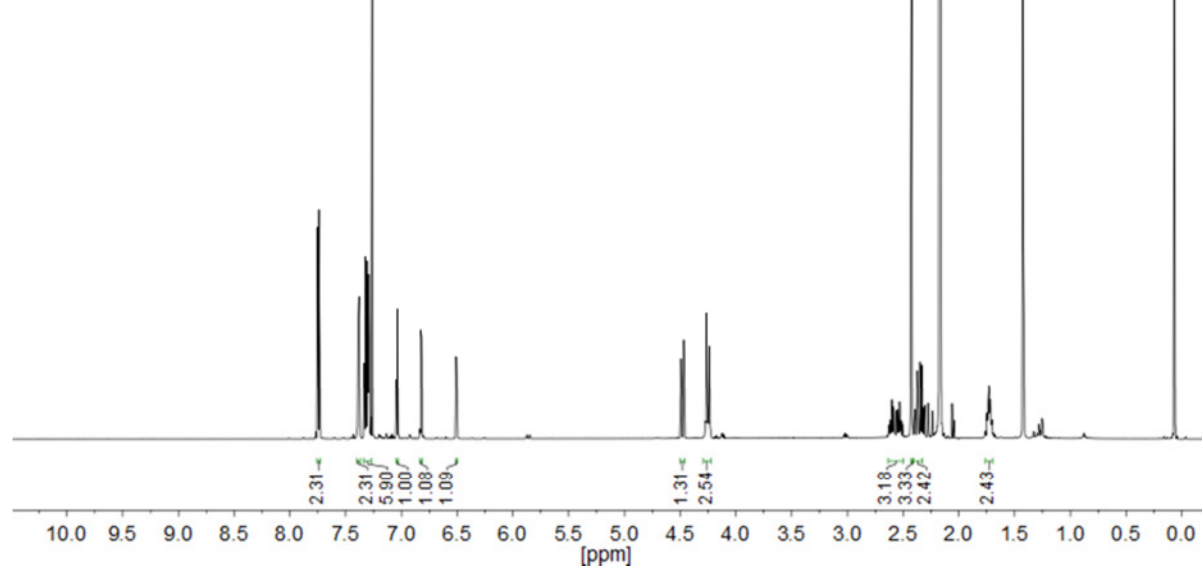

<sup>1</sup>H NMR-Spectrum (CDCl<sub>3</sub>) of **15**.

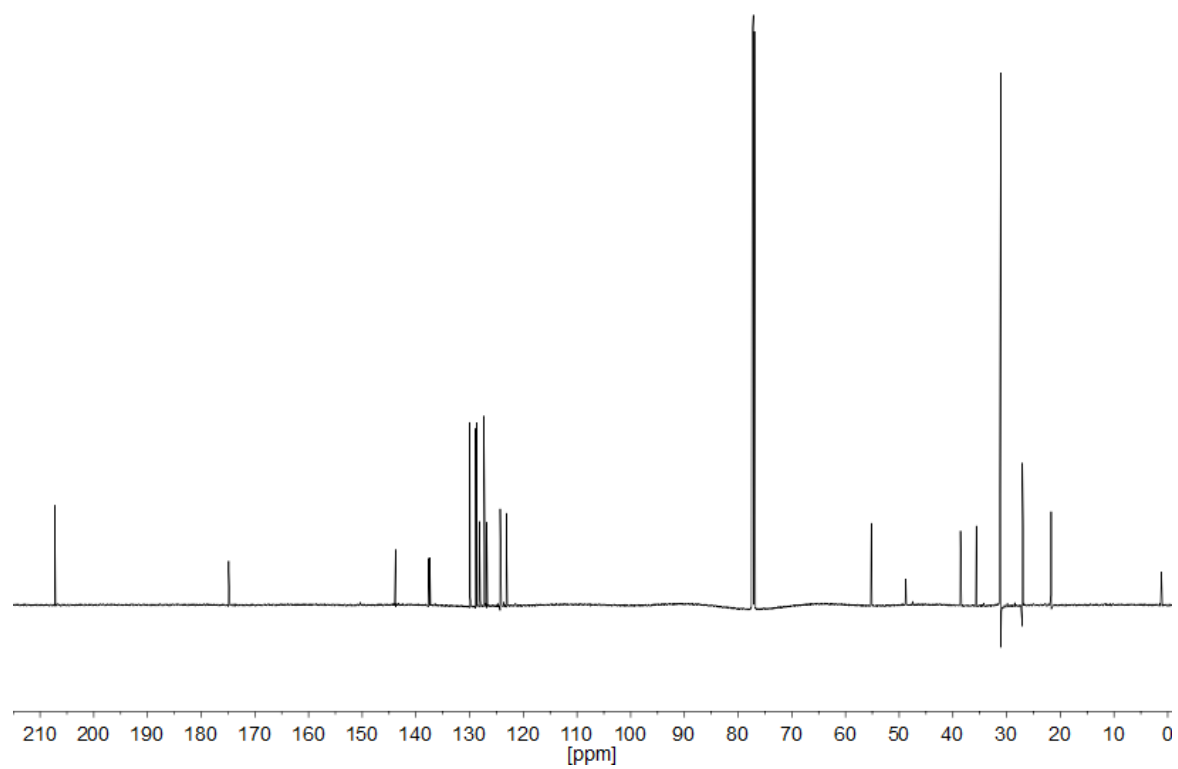

<sup>13</sup>C NMR-Spectrum (CDCl<sub>3</sub>) of **15**.

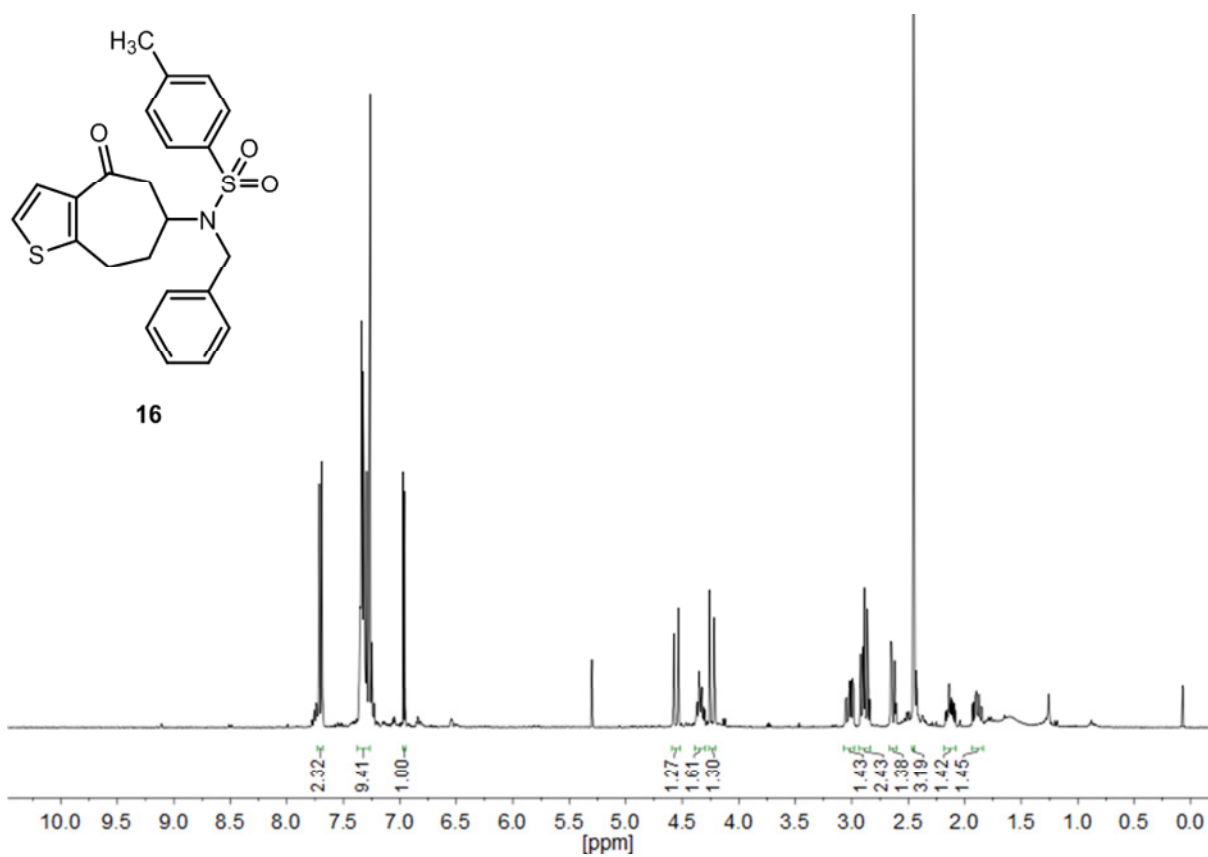

<sup>1</sup>H NMR-Spectrum (CDCl<sub>3</sub>) of **16**.

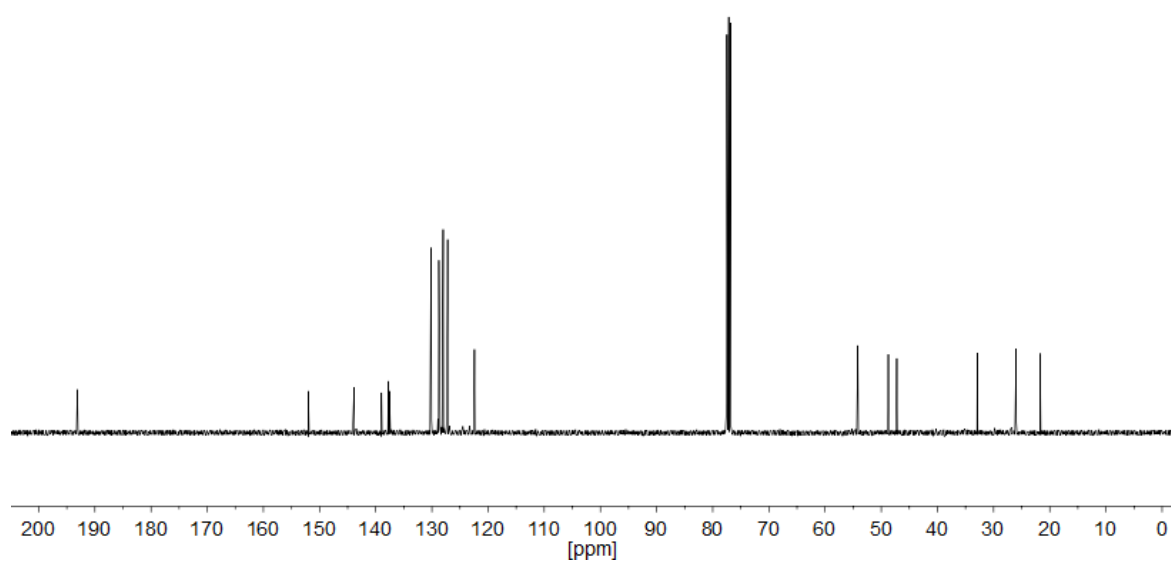

<sup>13</sup>C NMR-Spectrum (CDCl<sub>3</sub>) of **16**.

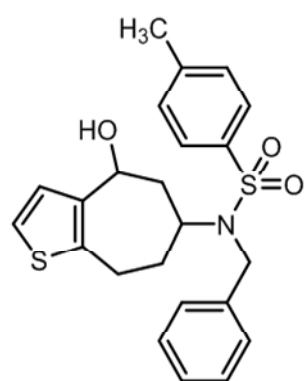

**17**

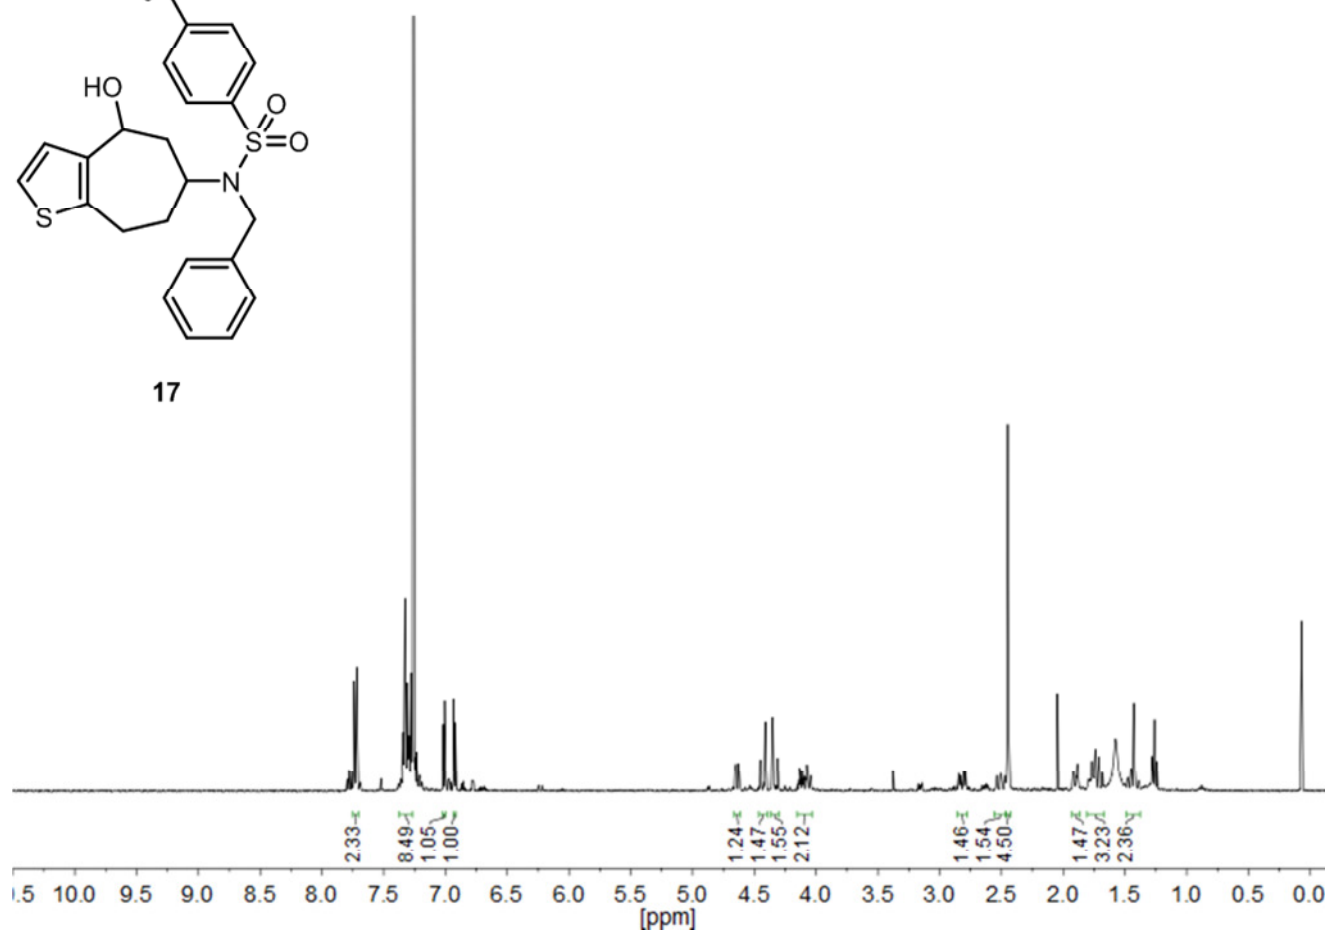

<sup>1</sup>H NMR-Spectrum (CDCl<sub>3</sub>) of **17**.



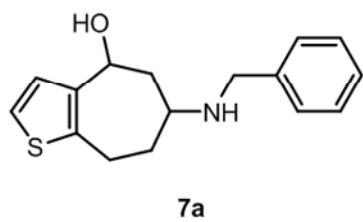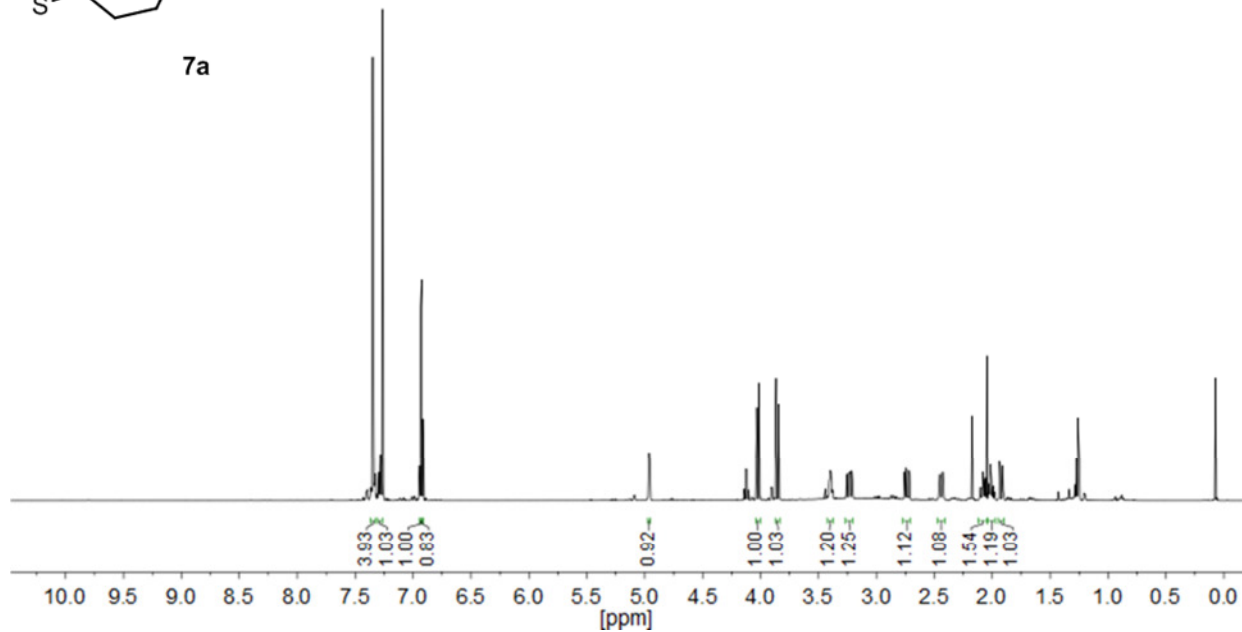

$^1\text{H}$  NMR-Spectrum ( $\text{CDCl}_3$ ) of **7a**.

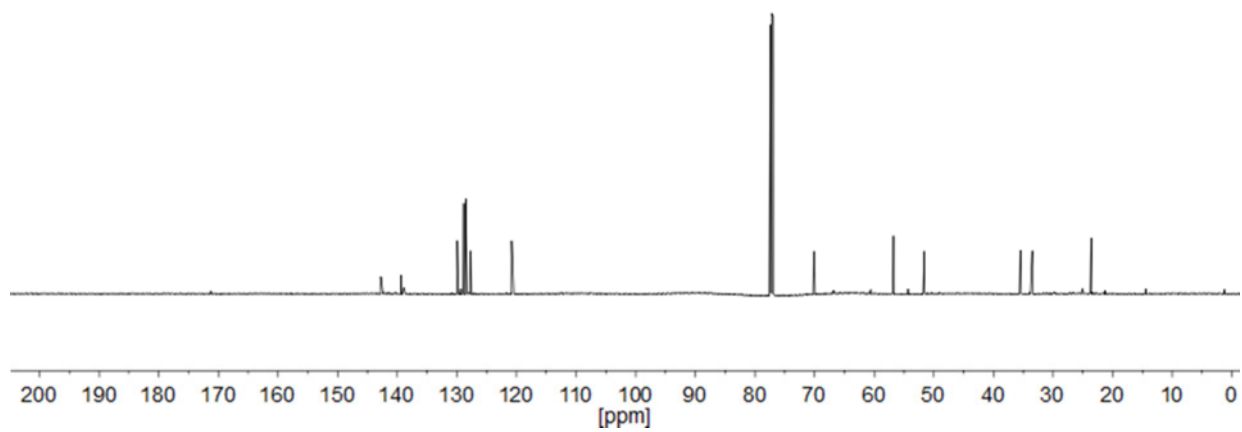

$^{13}\text{C}$  NMR-Spectrum ( $\text{CDCl}_3$ ) of **7a**.

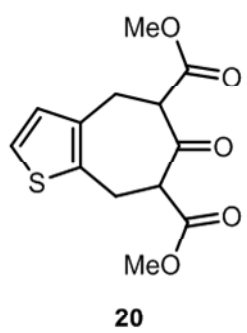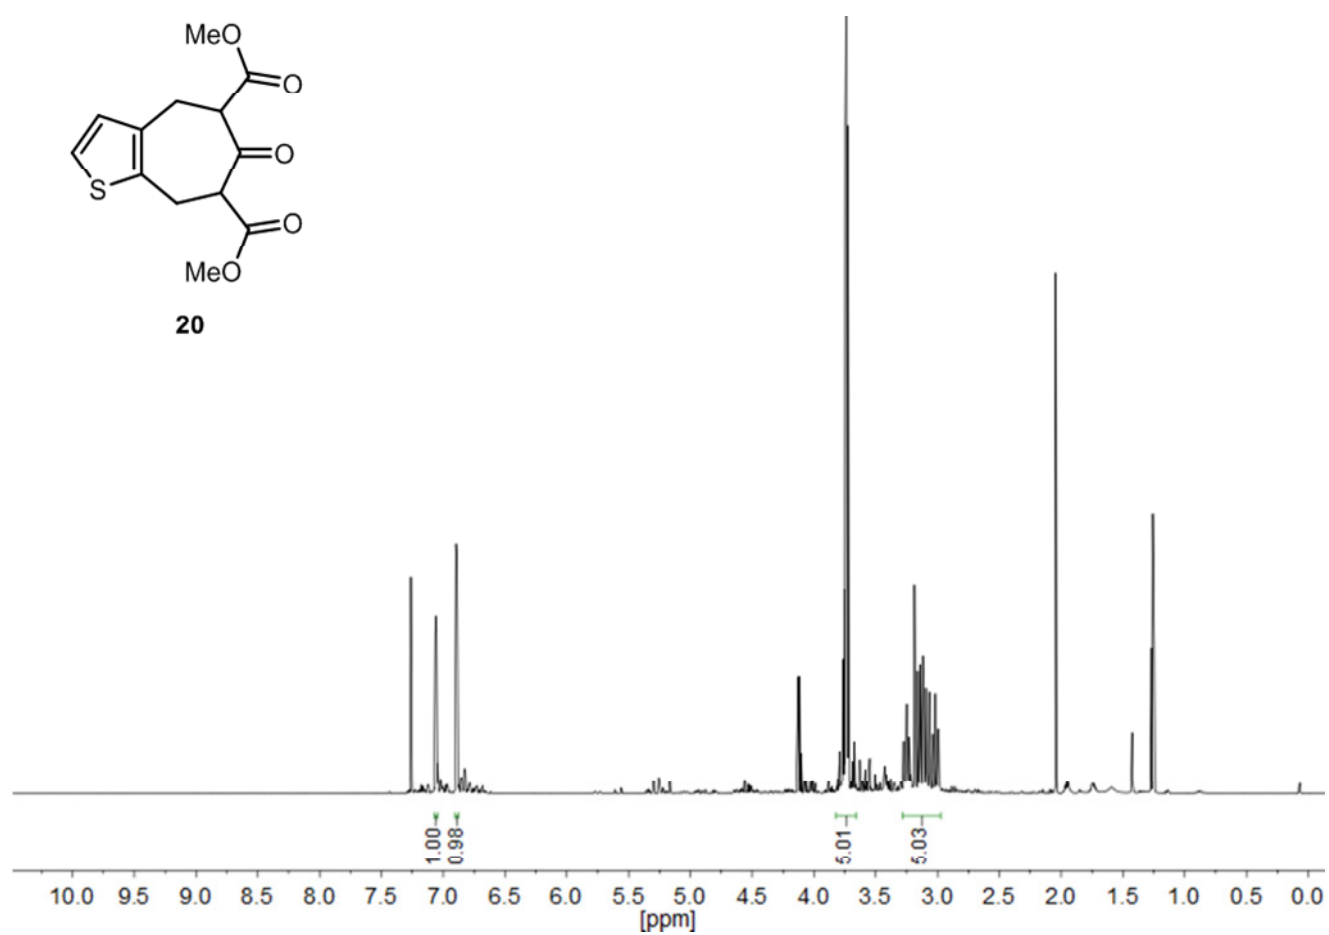

$^1\text{H}$  NMR-Spectrum ( $\text{CDCl}_3$ ) of **20**.

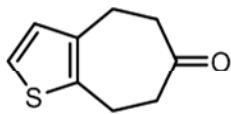

**21**

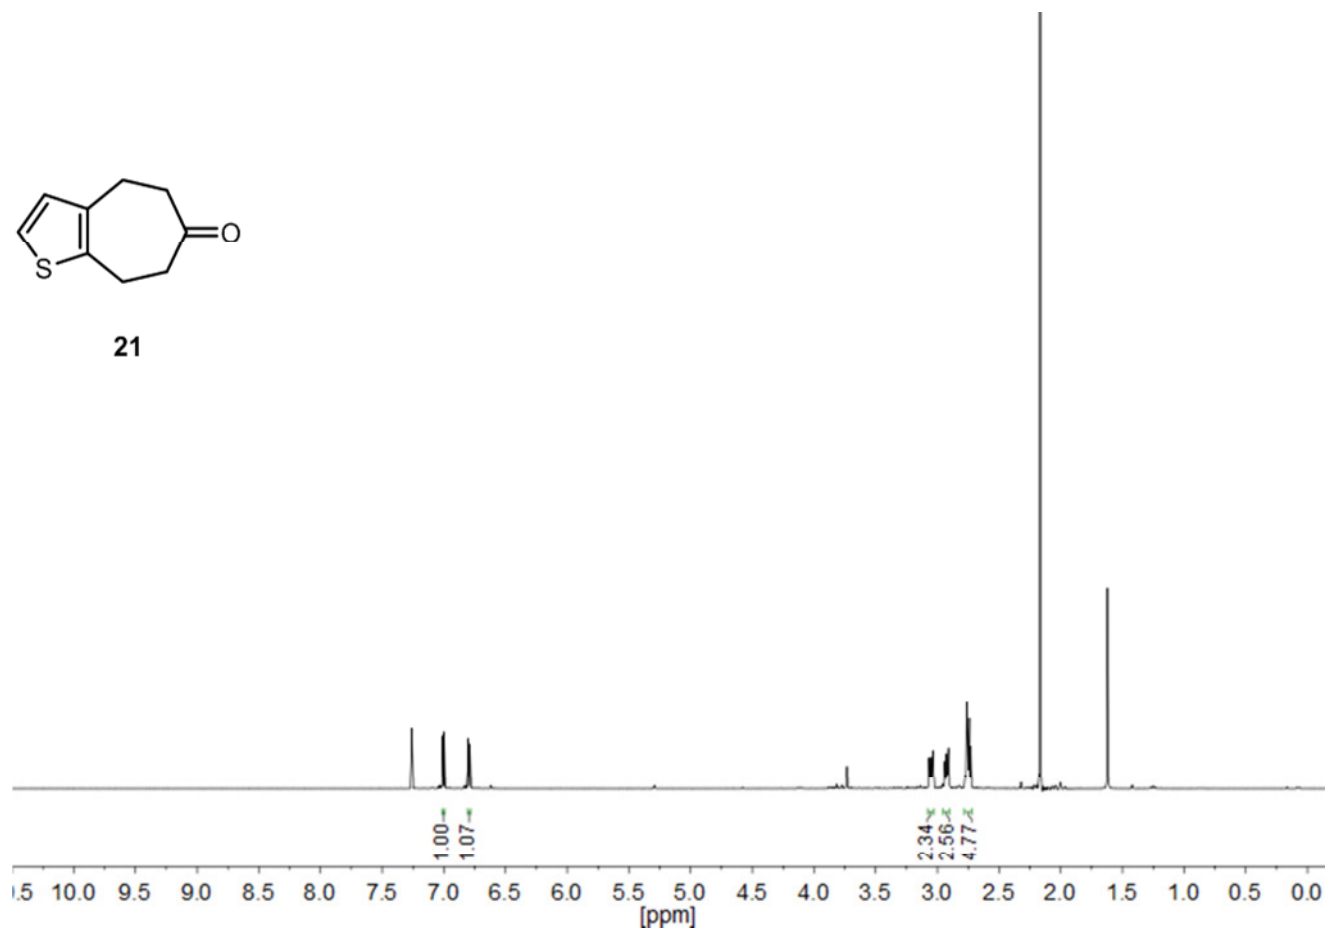

$^1\text{H}$  NMR-Spectrum ( $\text{CDCl}_3$ ) of **21**.

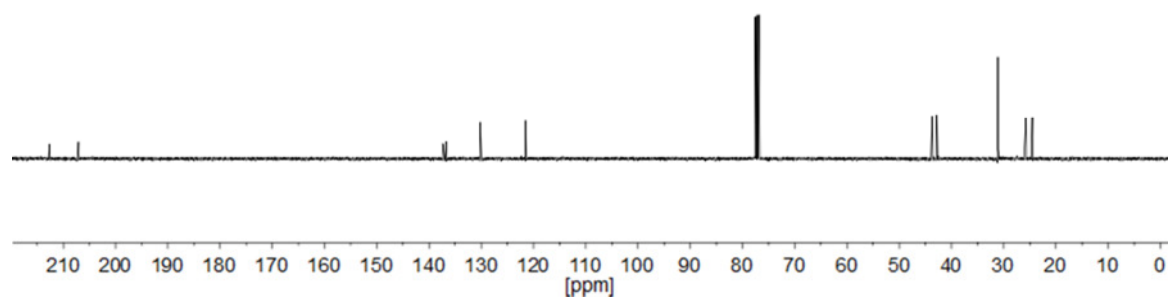

$^{13}\text{C}$  NMR-Spectrum ( $\text{CDCl}_3$ ) of **21**.

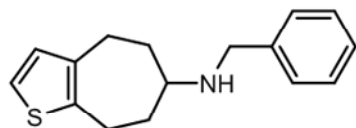

**8a**

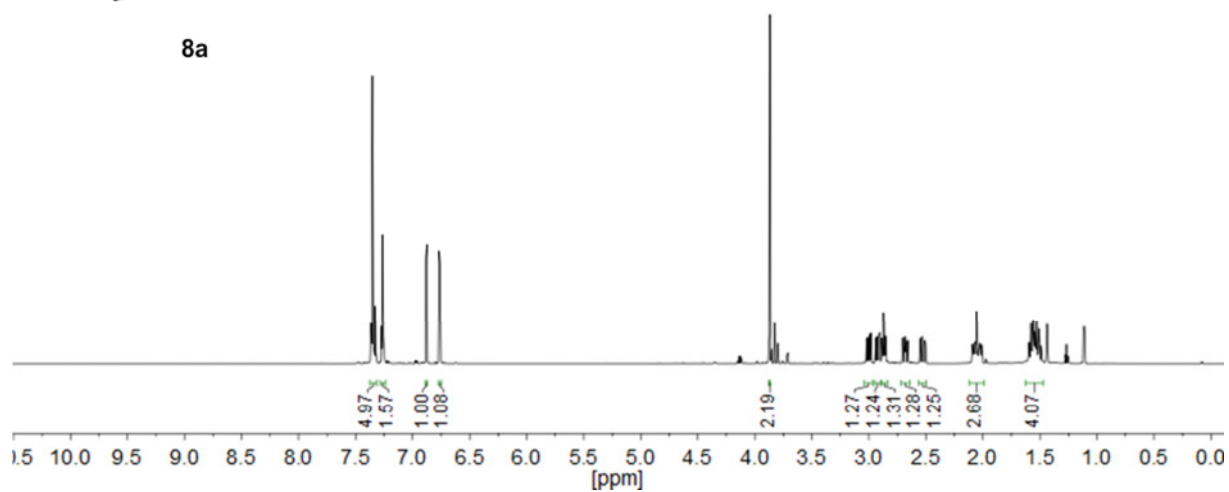

$^1\text{H}$  NMR-Spectrum ( $\text{CDCl}_3$ ) of **8a**.

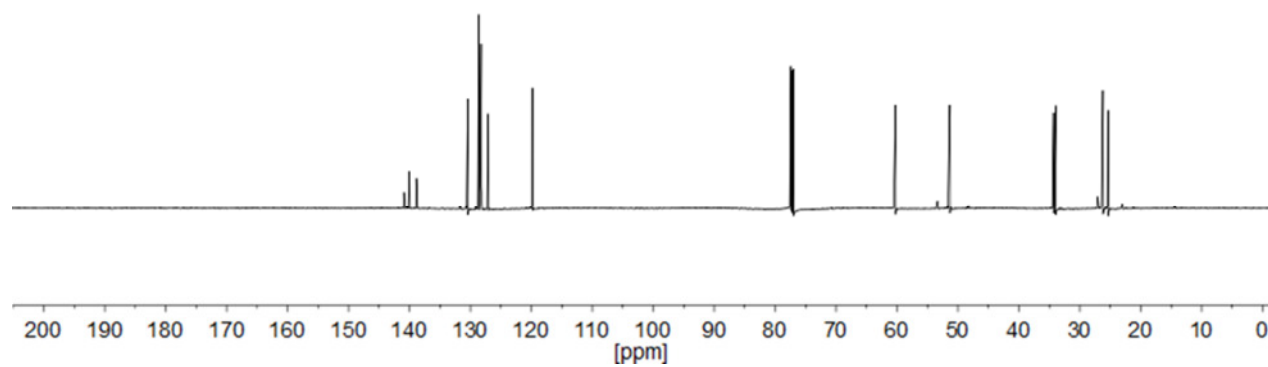

$^{13}\text{C}$  NMR-Spectrum ( $\text{CDCl}_3$ ) of **8a**.
